# Supplementary material for: Association of plasma and CSF cytochrome P450, soluble epoxide hydrolase, and ethanolamide metabolism with Alzheimer’s disease
Source: Alzheimers Res Ther. 2021 Sep 6;13:149. doi: 10.1186/s13195-021-00893-6 (PMC8422756; doi:10.1186/s13195-021-00893-6)
Supplement: Supplementary file 5 — Additional file 5 : Table S2. T-test of predicted fasted vs predicted non-fasted in AD group for plasma and CSF metabolites. [file 13195_2021_893_MOESM5_ESM.xlsx]

## Sheet: Biometrics 1
CSF			Raw output						Past round numbers						Round to 3 sig digits
	AD (n=150)	Control (n=139)		AD	Control
Y	Mean ± 95%CI		AD Lower 95% Mean	AD Mean	95%CI AD	Control Lower 95% Mean	Control Mean	95%CI Control	AD Lower 95% Mean	AD Mean	95%CI AD	Control Lower 95% Mean	Control Mean	95%CI Control	AD Lower 95% Mean	AD Mean	95%CI AD	Control Lower 95% Mean	Control Mean	95%CI Control
AB42.ELISA	300 ± 17.4	536 ± 25.8	282.417	299.854	17.4375	510.416	536.171	25.7557	282	300	17.4	510	536	25.8	282	300	17.4	510	536	25.8
Age	68.2 ± 1.34	65.2 ± 1.38	66.8254	68.1667	1.34123	63.8282	65.2086	1.38041	66.8	68.2	1.34	63.8	65.2	1.38	66.8	68.2	1.34	63.8	65.2	1.38
MoCA	16.4 ± 1.02	26.5 ± 0.523	15.359	16.3778	1.01877	25.988	26.5108	0.522754	15.4	16.4	1.02	26	26.5	0.523	15.4	16.4	1.02	26	26.5	0.523
pTau.ELISA	62.8 ± 3.88	31.6 ± 2.38	58.933	62.8179	3.88495	29.2542	31.6366	2.38242	58.9	62.8	3.88	29.3	31.6	2.38	58.9	62.8	3.88	29.3	31.6	2.38
tTau.ELISA	115 ± 7.58	54.1 ± 4.09	107.26	114.838	7.57811	49.9885	54.0825	4.094	107	115	7.58	50	54.1	4.09	107	115	7.58	50	54.1	4.09
Y	ApoE genotype %		Level	Count AD	Count Control	Prob AD	Prob Control
E2/E3	0.01333	0.17266	E2/E3	2	24	0.01333	0.17266
E2/E4	0.02	0.05036	E2/E4	3	7	0.02	0.05036
E3/E3	0.26667	0.53237	E3/E3	40	74	0.26667	0.53237
E3/E4	0.50667	0.21583	E3/E4	76	30	0.50667	0.21583
E4/E4	0.19333	0.02878	E4/E4	29	4	0.19333	0.02878
APOE.Genotype	Race %		Total	150	139	1	1
American Indian or Alaska tive	0.00667	-	American Indian or Alaska tive	1		0.00667
Asian	0.00667	0.00719	Asian	1	1	0.00667	0.00719
Black or African American	0.06667	0.13669	Black or African American	10	19	0.06667	0.13669
Caucasian or White	0.92	0.85612	Caucasian or White	138	119	0.92	0.85612
Race	Sex %		Total	150	139	1	1
Females	0.53333	0.71223	0	80	99	0.53333	0.71223
Males	0.46667	0.28058	1	70	39	0.46667	0.28058
			Total	150	139	1	1
Plasma	AD (n=147)	Control (n=121)
Y	Mean ± 95%CI		AD Lower 95% Mean	AD Mean	AD Upper 95% Mean	Control Lower 95% Mean	Control Mean	Control Upper 95% Mean	AD Lower 95% Mean	AD Mean	AD Upper 95% Mean	Control Lower 95% Mean	Control Mean	Control Upper 95% Mean	AD Lower 95% Mean	AD Mean	AD Upper 95% Mean	Control Lower 95% Mean	Control Mean	Control Upper 95% Mean
AB42.ELISA	300 ± 17.4	530 ± 25.8	282.772	300.218	17.4459	503.757	529.508	25.7508	283	300	17.4	504	530	25.8	283	300	17.4	504	530	25.8
Age	68 ± 1.36	65.6 ± 1.53	66.6626	68.0204	1.35785	64.0448	65.5702	1.5255	66.7	68	1.36	64	65.6	1.53	66.7	68	1.36	64	65.6	1.53
MoCA	16.4 ± 1.04	26.5 ± 0.579	15.3345	16.3712	1.03669	25.9333	26.5124	0.579119	15.3	16.4	1.04	25.9	26.5	0.579	15.3	16.4	1.04	25.9	26.5	0.579
pTau.ELISA	62.8 ± 3.93	30.7 ± 2.44	58.9102	62.8398	3.92961	28.2243	30.665	2.44068	58.9	62.8	3.93	28.2	30.7	2.44	58.9	62.8	3.93	28.2	30.7	2.44
tTau.ELISA	115 ± 7.71	53.7 ± 4.6	107.572	115.281	7.70869	49.0562	53.6551	4.59892	108	115	7.71	49.1	53.7	4.6	108	115	7.71	49.1	53.7	4.6
	ApoE genotype %		Level	Count AD	Count Control	Prob AD	Prob Control
E2/E3	0.01361	0.17355	E2/E3	2	21	0.01361	0.17355
E2/E4	0.02041	0.04132	E2/E4	3	5	0.02041	0.04132
E3/E3	0.27211	0.54545	E3/E3	40	66	0.27211	0.54545
E3/E4	0.4966	0.20661	E3/E4	73	25	0.4966	0.20661
E4/E4	0.19728	0.03306	E4/E4	29	4	0.19728	0.03306
	Race %
American Indian or Alaska tive	0.0068	-	American Indian or Alaska tive	1		0.0068
Asian	0.0068	-	Asian	1		0.0068
Black or African American	0.06803	0.1405	Black or African American	10	17	0.06803	0.1405
Caucasian or White	0.91837	0.8595	Caucasian or White	135	104	0.91837	0.8595
	Sex %
Females	0.53061	0.71901	0	78	87	0.53061	0.71901
Males	0.46939	0.27273	1	69	33	0.46939	0.27273

## Sheet: Final Biometrics
CSF
	AD (n=150)	Control (n=139)
Mean ± 95%CI
Age	68.2 ± 1.34	65.2 ± 1.38
AB42	300 ± 17.4	536 ± 25.8
MoCA	16.4 ± 1.02	26.5 ± 0.523
pTau	62.8 ± 3.88	31.6 ± 2.38
tTau	115 ± 7.58	54.1 ± 4.09
ApoE genotype %
E2/E3	0.01333	0.17266
E2/E4	0.02	0.05036
E3/E3	0.26667	0.53237
E3/E4	0.50667	0.21583
E4/E4	0.19333	0.02878
Race %
Native americans	0.00667	-
Asian	0.00667	0.00719
Black or African American	0.06667	0.13669
Caucasian or White	0.92	0.85612
Sex %
Females	0.53333	0.71223
Males	0.46667	0.28058
Plasma
	AD (n=147)	Control (n=121)
Mean ± 95%CI
Age	68 ± 1.36	65.6 ± 1.53
AB42	300 ± 17.4	530 ± 25.8
MoCA	16.4 ± 1.04	26.5 ± 0.579
pTau	62.8 ± 3.93	30.7 ± 2.44
tTau	115 ± 7.71	53.7 ± 4.6
ApoE genotype %
E2/E3	0.01361	0.17355
E2/E4	0.02041	0.04132
E3/E3	0.27211	0.54545
E3/E4	0.4966	0.20661
E4/E4	0.19728	0.03306
Race %
American Indian or Alaska tive	0.0068	-
Asian	0.0068	-
Black or African American	0.06803	0.1405
Caucasian or White	0.91837	0.8595
Sex %
Females	0.53061	0.71901
Males	0.46939	0.27273

## Sheet: Fasting vs non fasting
Table S2. T-test of predicted fasted vs predicted non-fasted in AD group for plasma and CSF metabolites.
CSF
Metabolite	P value	Fold change	Mean (nM) [95%CI]
			Fasted	Non-fasted
PGF2a	0.0251	1.25	0.0274 [0.0235-0.032]	0.0342 [0.0301-0.0388]
GCA/GCDCA	0.0263	1.18	1.12 [0.993-1.27]	1.32 [1.15-1.52]
12_13-DiHOME	0.03	1.27	0.0305 [0.0268-0.0347]	0.0387 [0.0328-0.0457]
UDCA/CDCA	0.0472	0.585	0.978 [0.683-1.4]	0.572 [0.441-0.744]
12,13-DiHOME/EpOME	0.0626	1.24	0.0918 [0.077-0.109]	0.114 [0.0939-0.137]
OEA	0.07	1.13	0.082 [0.0757-0.0888]	0.0923 [0.0832-0.102]
DCA/(LCA+UDCA)	0.0737	1.52	1.83 [1.28-2.62]	2.79 [2.13-3.65]
TCA	0.0742	1.38	0.407 [0.295-0.561]	0.563 [0.447-0.711]
15_16-DiHODE	0.0875	1.16	0.0669 [0.0567-0.0789]	0.0775 [0.0666-0.0902]
GCA	0.0925	1.25	0.887 [0.712-1.11]	1.11 [0.897-1.37]
LA_RelAb	0.108	0.915	0.248 [0.228-0.269]	0.227 [0.212-0.244]
GLCA/CDCA	0.114	0.674	0.0362 [0.0263-0.0497]	0.0244 [0.0187-0.0318]
Sum(DiHOME)/Sum(EpOME)	0.121	1.2	0.0794 [0.066-0.0955]	0.0954 [0.0788-0.115]
9_10-DiHOME	0.122	1.17	0.0197 [0.017-0.0228]	0.023 [0.0194-0.0273]
GDCA/GLCA	0.14	1.34	10.1 [7.44-13.6]	13.5 [10.7-17.2]
UDCA	0.153	0.693	1.12 [0.767-1.62]	0.776 [0.593-1.01]
(GDCA+TDCA)/(TLCA+GLCA)	0.154	1.33	11.4 [8.4-15.5]	15.2 [12-19.4]
GCDCA/GLCA	0.169	1.32	19.2 [14.8-24.8]	25.4 [20.6-31.2]
TUDCA/UDCA	0.189	1.46	0.00304 [0.00188-0.00489]	0.00445 [0.0031-0.00639]
GLCA	0.226	0.799	0.0413 [0.0332-0.0512]	0.033 [0.0269-0.0406]
EPA + DHA diols	0.236	0.866	0.157 [0.137-0.181]	0.136 [0.119-0.155]
17_18-DiHETE	0.268	0.768	0.104 [0.0877-0.124]	0.0799 [0.063-0.101]
9,10-DiHOME/EpOME	0.269	1.14	0.0641 [0.0517-0.0794]	0.0728 [0.0588-0.09]
GCA/GDCA	0.27	1.16	2.14 [1.66-2.75]	2.48 [1.96-3.14]
13-HOTE	0.273	1.08	0.0478 [0.0419-0.0546]	0.0517 [0.047-0.0569]
GUDCA/UDCA	0.291	1.37	0.0921 [0.0617-0.137]	0.126 [0.0904-0.176]
(TUDAC+GUDCA)/UDCA	0.295	1.36	0.0976 [0.0656-0.145]	0.133 [0.0954-0.184]
ALA_RelAb	0.297	0.949	0.272 [0.253-0.293]	0.258 [0.24-0.276]
(GDCA+GLCA)/(TDCA)	0.31	0.905	11.6 [9.19-14.6]	10.5 [9.13-12.1]
19_20-DiHDoPE	0.333	0.918	0.0183 [0.0157-0.0213]	0.0168 [0.0151-0.0188]
AA_RelAb	0.354	0.941	0.256 [0.234-0.281]	0.241 [0.223-0.261]
CDCA	0.375	1.19	1.14 [0.886-1.47]	1.36 [1.11-1.65]
GCDCA/CDCA	0.376	0.892	0.693 [0.532-0.903]	0.618 [0.525-0.727]
TCDCA	0.387	1.11	0.0656 [0.051-0.0845]	0.0726 [0.0583-0.0903]
(TCDCA+GCDCA)/CDCA	0.396	0.889	0.767 [0.587-1]	0.682 [0.578-0.805]
a-MCA	0.4	1.22	0.0316 [0.0212-0.047]	0.0387 [0.0291-0.0515]
20-HETE	0.41	1.07	0.121 [0.107-0.136]	0.13 [0.118-0.143]
T-a-MCA	0.415	1.06	0.0294 [0.0229-0.0378]	0.0311 [0.0243-0.0399]
13-HODE	0.416	1.03	1.56 [1.51-1.61]	1.61 [1.55-1.68]
EPA_RelAb	0.418	0.915	0.211 [0.179-0.25]	0.193 [0.168-0.222]
TCDCA/GCDCA	0.421	1.04	0.083 [0.0683-0.101]	0.0867 [0.0742-0.101]
GDCA	0.427	1.08	0.415 [0.325-0.531]	0.447 [0.364-0.549]
14,15/11,12-DiHETrE	0.428	1.03	2.74 [2.59-2.9]	2.82 [2.67-2.98]
9-HOTE	0.428	1.05	0.0119 [0.0106-0.0133]	0.0125 [0.0112-0.0139]
14_15-DiHETE	0.431	0.874	0.0247 [0.0196-0.0312]	0.0216 [0.0168-0.0279]
TDCA	0.432	1.14	0.0422 [0.0303-0.0588]	0.0479 [0.0377-0.0609]
TEST	0.434	1.11	0.0426 [0.0301-0.0602]	0.0472 [0.0358-0.0623]
17OH-PROG	0.436	1.1	0.0436 [0.0381-0.0498]	0.0479 [0.0424-0.0541]
11_12-DiHETrE	0.45	0.954	0.0175 [0.0154-0.0199]	0.0167 [0.0151-0.0184]
w-MCA/UDCA	0.456	1.34	0.107 [0.071-0.162]	0.143 [0.0968-0.211]
w-MCA/T-a-MCA	0.528	0.875	4.07 [2.54-6.53]	3.56 [2.23-5.67]
TDCA/GDCA	0.57	1.05	0.102 [0.0823-0.126]	0.107 [0.0937-0.123]
(TDCA+TCDCA)/(GDCA+GCDCA)	0.587	1.03	0.0934 [0.0775-0.113]	0.0958 [0.0837-0.11]
LEA	0.59	1	0.255 [0.237-0.274]	0.256 [0.245-0.268]
DHEA	0.592	0.939	0.0163 [0.0141-0.0188]	0.0153 [0.0138-0.0171]
DCA	0.609	1.06	2.04 [1.58-2.64]	2.16 [1.7-2.75]
(GDCA+TDCA)/(TUDCA+GUDCA)	0.62	1.13	4.33 [2.96-6.32]	4.89 [3.65-6.54]
TDCA/DCA	0.626	1.07	0.0207 [0.0144-0.0296]	0.0222 [0.0174-0.0283]
TDCA/DCA 2	0.626	1.07	0.0207 [0.0144-0.0296]	0.0222 [0.0174-0.0283]
w-MCA	0.634	0.925	0.12 [0.0816-0.176]	0.111 [0.0778-0.158]
CRTN	0.701	1.03	4.26 [3.89-4.66]	4.37 [4.1-4.66]
GCDCA/GDCA	0.744	0.984	1.9 [1.52-2.39]	1.87 [1.51-2.32]
11-Deoxy-CTRL	0.746	0.948	0.0541 [0.0474-0.0617]	0.0513 [0.0454-0.058]
GUDCA	0.769	0.949	0.103 [0.0766-0.138]	0.0977 [0.0771-0.124]
TUDCA	0.769	1.02	0.00339 [0.0025-0.00459]	0.00345 [0.00271-0.0044]
F2-IsoP	0.79	0.97	0.301 [0.28-0.323]	0.292 [0.272-0.314]
CRTL	0.855	1	14.4 [13.1-15.9]	14.4 [13.5-15.4]
12(13)-EpOME	0.863	1.03	0.332 [0.285-0.387]	0.341 [0.298-0.391]
TCDCA/CDCA	0.887	0.932	0.0575 [0.0402-0.0822]	0.0536 [0.0412-0.0696]
GCDCA	0.889	1.06	0.79 [0.658-0.949]	0.837 [0.723-0.97]
14_15-DiHETrE	0.901	0.981	0.0479 [0.043-0.0535]	0.047 [0.0435-0.0508]
DHA_RelAb	0.925	0.988	0.256 [0.224-0.293]	0.253 [0.224-0.286]
9-HODE	0.931	1.02	0.532 [0.511-0.553]	0.544 [0.518-0.571]
GDCA/DCA	0.934	1.02	0.203 [0.166-0.249]	0.207 [0.179-0.239]
(TDCA+GDCA)/DCA	0.937	1.01	0.231 [0.186-0.286]	0.233 [0.2-0.271]
CRCTN	0.954	0.998	0.414 [0.35-0.49]	0.413 [0.361-0.472]
9(10)-EpOME	0.975	1.03	0.307 [0.257-0.366]	0.317 [0.268-0.374]
T-a-MCA/CDCA	0.995	0.891	0.0258 [0.0181-0.0368]	0.023 [0.0164-0.0322]
Plasma
12(13)-EpOME	0.0001	2.79	2.41 [2.07-2.8]	6.73 [5.54-8.17]
12_13-DiHODE	0.0001	2.52	0.209 [0.161-0.271]	0.527 [0.448-0.62]
12_13-DiHOME	0.0001	2.29	3.86 [3.38-4.41]	8.83 [7.62-10.2]
13-HOTE	0.0001	2.26	0.624 [0.483-0.806]	1.41 [1.17-1.7]
15(16)-EpODE	0.0001	2.17	2.42 [2.06-2.84]	5.24 [4.33-6.35]
15_16-DiHODE	0.0001	2.28	10.9 [9.47-12.5]	24.9 [21.5-28.9]
9(10)-EpOME	0.0001	1.92	0.372 [0.305-0.454]	0.713 [0.574-0.885]
9_10-DiHODE	0.0001	4.33	0.183 [0.144-0.233]	0.792 [0.629-0.997]
9_10-DiHOME	0.0001	2.93	3.25 [2.94-3.59]	9.53 [8.04-11.3]
9_10-e-DiHO	0.0001	1.56	3.05 [2.68-3.46]	4.75 [4.07-5.54]
9-HOTE	0.0001	1.72	0.446 [0.39-0.511]	0.769 [0.652-0.906]
AA_screen	0.0001	0.645	0.155 [0.139-0.172]	0.1 [0.0895-0.113]
AEA	0.0001	0.691	1.49 [1.36-1.64]	1.03 [0.92-1.15]
GCA	0.0001	3.31	68.6 [51.6-91.1]	227 [179-288]
GCDCA	0.0001	2.97	367 [270-499]	1090 [896-1330]
GDCA	0.0001	2.83	186 [125-277]	526 [399-694]
NA-Gly	0.0001	0.619	0.72 [0.621-0.835]	0.446 [0.389-0.512]
NO-Gly	0.0001	0.53	4.7 [4.29-5.16]	2.49 [2.18-2.85]
OEA	0.0001	0.755	5.23 [4.79-5.7]	3.95 [3.58-4.36]
TCA	0.0001	3.56	11.7 [8.1-16.9]	41.7 [32.3-53.9]
TCDCA	0.0001	3.27	30.3 [21.6-42.7]	99 [77.4-127]
TDCA	0.0001	2.92	13.7 [8.95-21]	40 [29.1-55.1]
POEA_Screen	0.0002	0.603	0.119 [0.0985-0.144]	0.0718 [0.0602-0.0856]
TLCA	0.0002	2.3	7.56 [5.18-11.1]	17.4 [13.2-23]
DHA_screen	0.0003	0.652	0.149 [0.128-0.174]	0.0971 [0.0838-0.113]
DHEA	0.0003	0.726	1.18 [1.04-1.34]	0.857 [0.78-0.941]
LA_screen	0.0004	0.722	0.158 [0.138-0.18]	0.114 [0.101-0.129]
9_12_13-TriHOME	0.0005	1.63	2.65 [2.2-3.18]	4.32 [3.64-5.13]
GUDCA	0.0006	2.31	46.3 [32.8-65.4]	107 [80.8-142]
LEA	0.0006	0.811	4.5 [4.13-4.91]	3.65 [3.39-3.93]
ALA_screen	0.0008	0.646	0.153 [0.128-0.184]	0.0988 [0.0822-0.119]
GLCA	0.0009	2.27	21.8 [14.8-32.1]	49.5 [38.2-64.1]
9-HODE	0.0015	1.46	10.9 [9.66-12.2]	15.9 [13.5-18.7]
DGLEA	0.0016	0.726	0.175 [0.151-0.201]	0.127 [0.11-0.147]
EPA_screen	0.0017	0.625	0.13 [0.108-0.156]	0.0813 [0.0672-0.0983]
13-HODE	0.0023	1.45	14.3 [12.7-16.1]	20.7 [17.5-24.5]
GHDCA	0.0023	1.88	0.8 [0.611-1.05]	1.5 [1.24-1.82]
T-a-MCA	0.0037	1.95	2.62 [1.9-3.63]	5.1 [3.86-6.73]
5-HETE	0.0056	0.755	3.79 [3.35-4.29]	2.86 [2.52-3.23]
DEA	0.0072	0.788	0.378 [0.325-0.44]	0.298 [0.266-0.334]
TUDCA	0.0084	1.69	1.92 [1.54-2.4]	3.24 [2.56-4.09]
12-HETE	0.0137	0.786	2.81 [2.46-3.21]	2.21 [1.95-2.51]
15-HETE	0.0202	0.824	3.13 [2.81-3.49]	2.58 [2.28-2.92]
Ibuprofen	0.0266	0.427	41 [21.4-78.4]	17.5 [10.9-27.9]
w-MCA	0.0392	1.78	7.68 [5.53-10.7]	13.7 [10.2-18.4]
CDCA	0.0401	1.9	46.7 [32.6-66.9]	88.5 [61.6-127]
1-LG	0.0436	1.23	175 [155-197]	215 [192-241]
aLEA	0.0483	0.837	0.184 [0.164-0.207]	0.154 [0.138-0.172]
DCA	0.0893	1.55	177 [120-259]	274 [206-366]
TEST	0.0953	0.924	2.5 [1.63-3.85]	2.31 [1.6-3.34]
11_12-DiHETrE	0.0989	0.877	0.81 [0.735-0.894]	0.71 [0.64-0.788]
11-HETE	0.1022	0.845	1.61 [1.4-1.86]	1.36 [1.19-1.56]
9(10)-EpODE	0.1086	1.32	0.145 [0.112-0.187]	0.192 [0.146-0.253]
9-HETE	0.1162	0.803	1.32 [1.12-1.57]	1.06 [0.894-1.27]
2-LG	0.1187	1.19	46.4 [41-52.5]	55 [49.4-61.3]
13-KODE	0.1265	0.732	1.42 [1.16-1.74]	1.04 [0.809-1.33]
11(12)-EpETrE	0.1495	0.697	0.0755 [0.0608-0.0938]	0.0526 [0.0415-0.0665]
14(15)-EpETrE	0.1565	1.07	0.106 [0.0826-0.136]	0.113 [0.0936-0.137]
PGF2a	0.1565	1.35	0.416 [0.313-0.554]	0.56 [0.473-0.664]
14-HDoHE	0.1646	0.804	1.58 [1.19-2.11]	1.27 [0.96-1.67]
CA	0.1729	1.66	19.3 [13.6-27.4]	32 [21.7-47.2]
Progesterone	0.1736	1.26	0.37 [0.317-0.432]	0.466 [0.39-0.558]
EPEA_Screen	0.1844	0.808	0.0873 [0.0704-0.108]	0.0705 [0.0581-0.0855]
14_15-DiHETrE	0.2208	0.922	1 [0.912-1.1]	0.922 [0.83-1.02]
8_9-DiHETrE	0.249	0.742	0.365 [0.279-0.476]	0.271 [0.215-0.342]
PGE2	0.2637	1.22	0.16 [0.13-0.197]	0.195 [0.16-0.238]
5_6-DiHETrE	0.2763	0.875	0.51 [0.449-0.581]	0.446 [0.384-0.518]
Naproxen	0.3047	0.565	191 [57.1-637]	108 [40-294]
5-HEPE	0.3191	0.82	0.572 [0.463-0.706]	0.469 [0.387-0.568]
b-MCA	0.3361	0.813	2.41 [1.79-3.24]	1.96 [1.55-2.49]
12-HEPE	0.4055	0.9	0.311 [0.252-0.383]	0.28 [0.236-0.332]
Acetaminophen	0.4853	1.11	5.52 [2.81-10.8]	6.14 [3.36-11.2]
1-AG	0.5174	1.07	19 [16.9-21.4]	20.4 [18.2-22.8]
UDCA	0.5175	0.877	91.6 [62.8-134]	80.3 [59.2-109]
LCA	0.5555	1.12	30 [23.7-38]	33.6 [27.2-41.5]
9-HEPE	0.5787	1.02	0.158 [0.111-0.225]	0.161 [0.132-0.196]
1-OG	0.595	1.09	282 [252-316]	308 [276-344]
2-AG	0.6627	1.07	4.77 [4.24-5.37]	5.12 [4.49-5.84]
CRCTN	0.6773	1.09	0.743 [0.58-0.953]	0.808 [0.693-0.943]
CRTN	0.6992	0.966	4.76 [3.71-6.11]	4.6 [3.85-5.49]
4-HDoHE	0.717	0.951	0.649 [0.549-0.768]	0.617 [0.506-0.751]
17_18-DiHETE	0.7633	1.01	5.23 [4.32-6.34]	5.29 [4.49-6.23]
15-HEPE	0.7908	0.925	0.292 [0.239-0.356]	0.27 [0.223-0.327]
8-HETE	0.8305	0.992	2.51 [2.16-2.93]	2.49 [2.18-2.84]
TXB2	0.8681	1.03	0.231 [0.183-0.292]	0.239 [0.193-0.298]
19_20-DiHDoPE	0.8845	0.985	2.03 [1.78-2.33]	2 [1.8-2.23]
17-OH PROG	0.8963	1.03	0.951 [0.764-1.18]	0.978 [0.805-1.19]
PGD2	0.9007	0.928	0.264 [0.176-0.397]	0.245 [0.178-0.338]
CRTL	0.9039	1.17	207 [158-272]	242 [217-270]
2-OG	0.9312	1.05	34.1 [29.8-39.1]	35.9 [31.6-40.7]
5_15-DiHETE	0.9689	1.1	0.105 [0.0756-0.146]	0.115 [0.0904-0.146]
DHEAS	0.9727	1.24	1220 [923-1610]	1510 [1310-1740]
F2-IsoP	0.9741	0.959	6.36 [5.33-7.59]	6.1 [5.34-6.98]
